# Supplementary figures and images for: Cascade effect of rock bridge failure in planar rock slides: explicit numerical modelling with a distinct element code
Source: Copernicus journal article supplement (doi:10.5194/nhess-2020-279), 2020-10-17

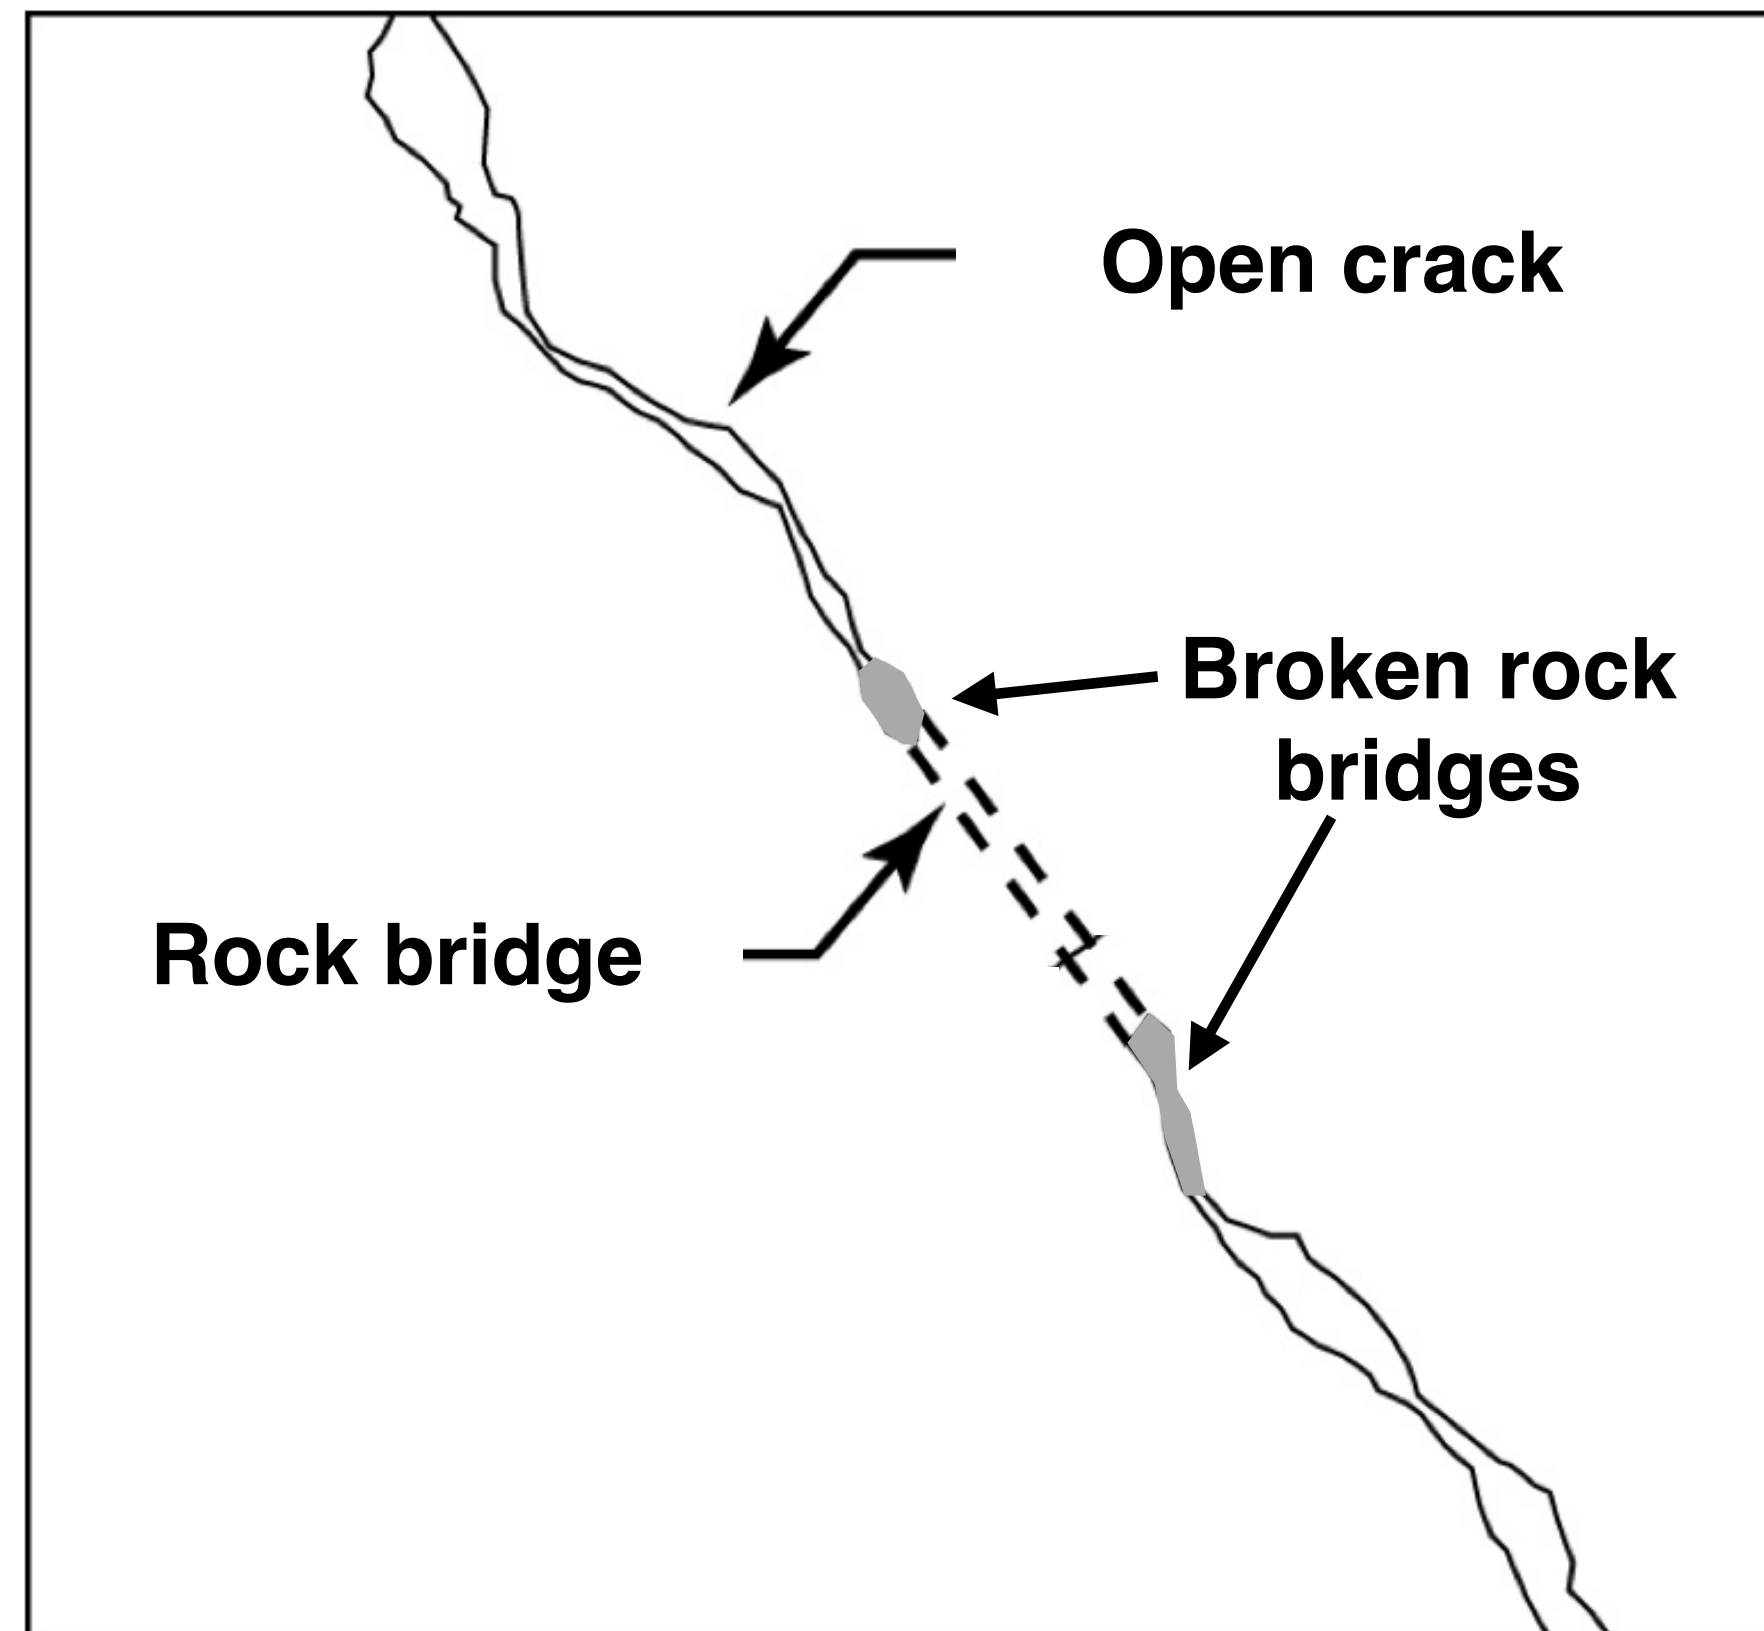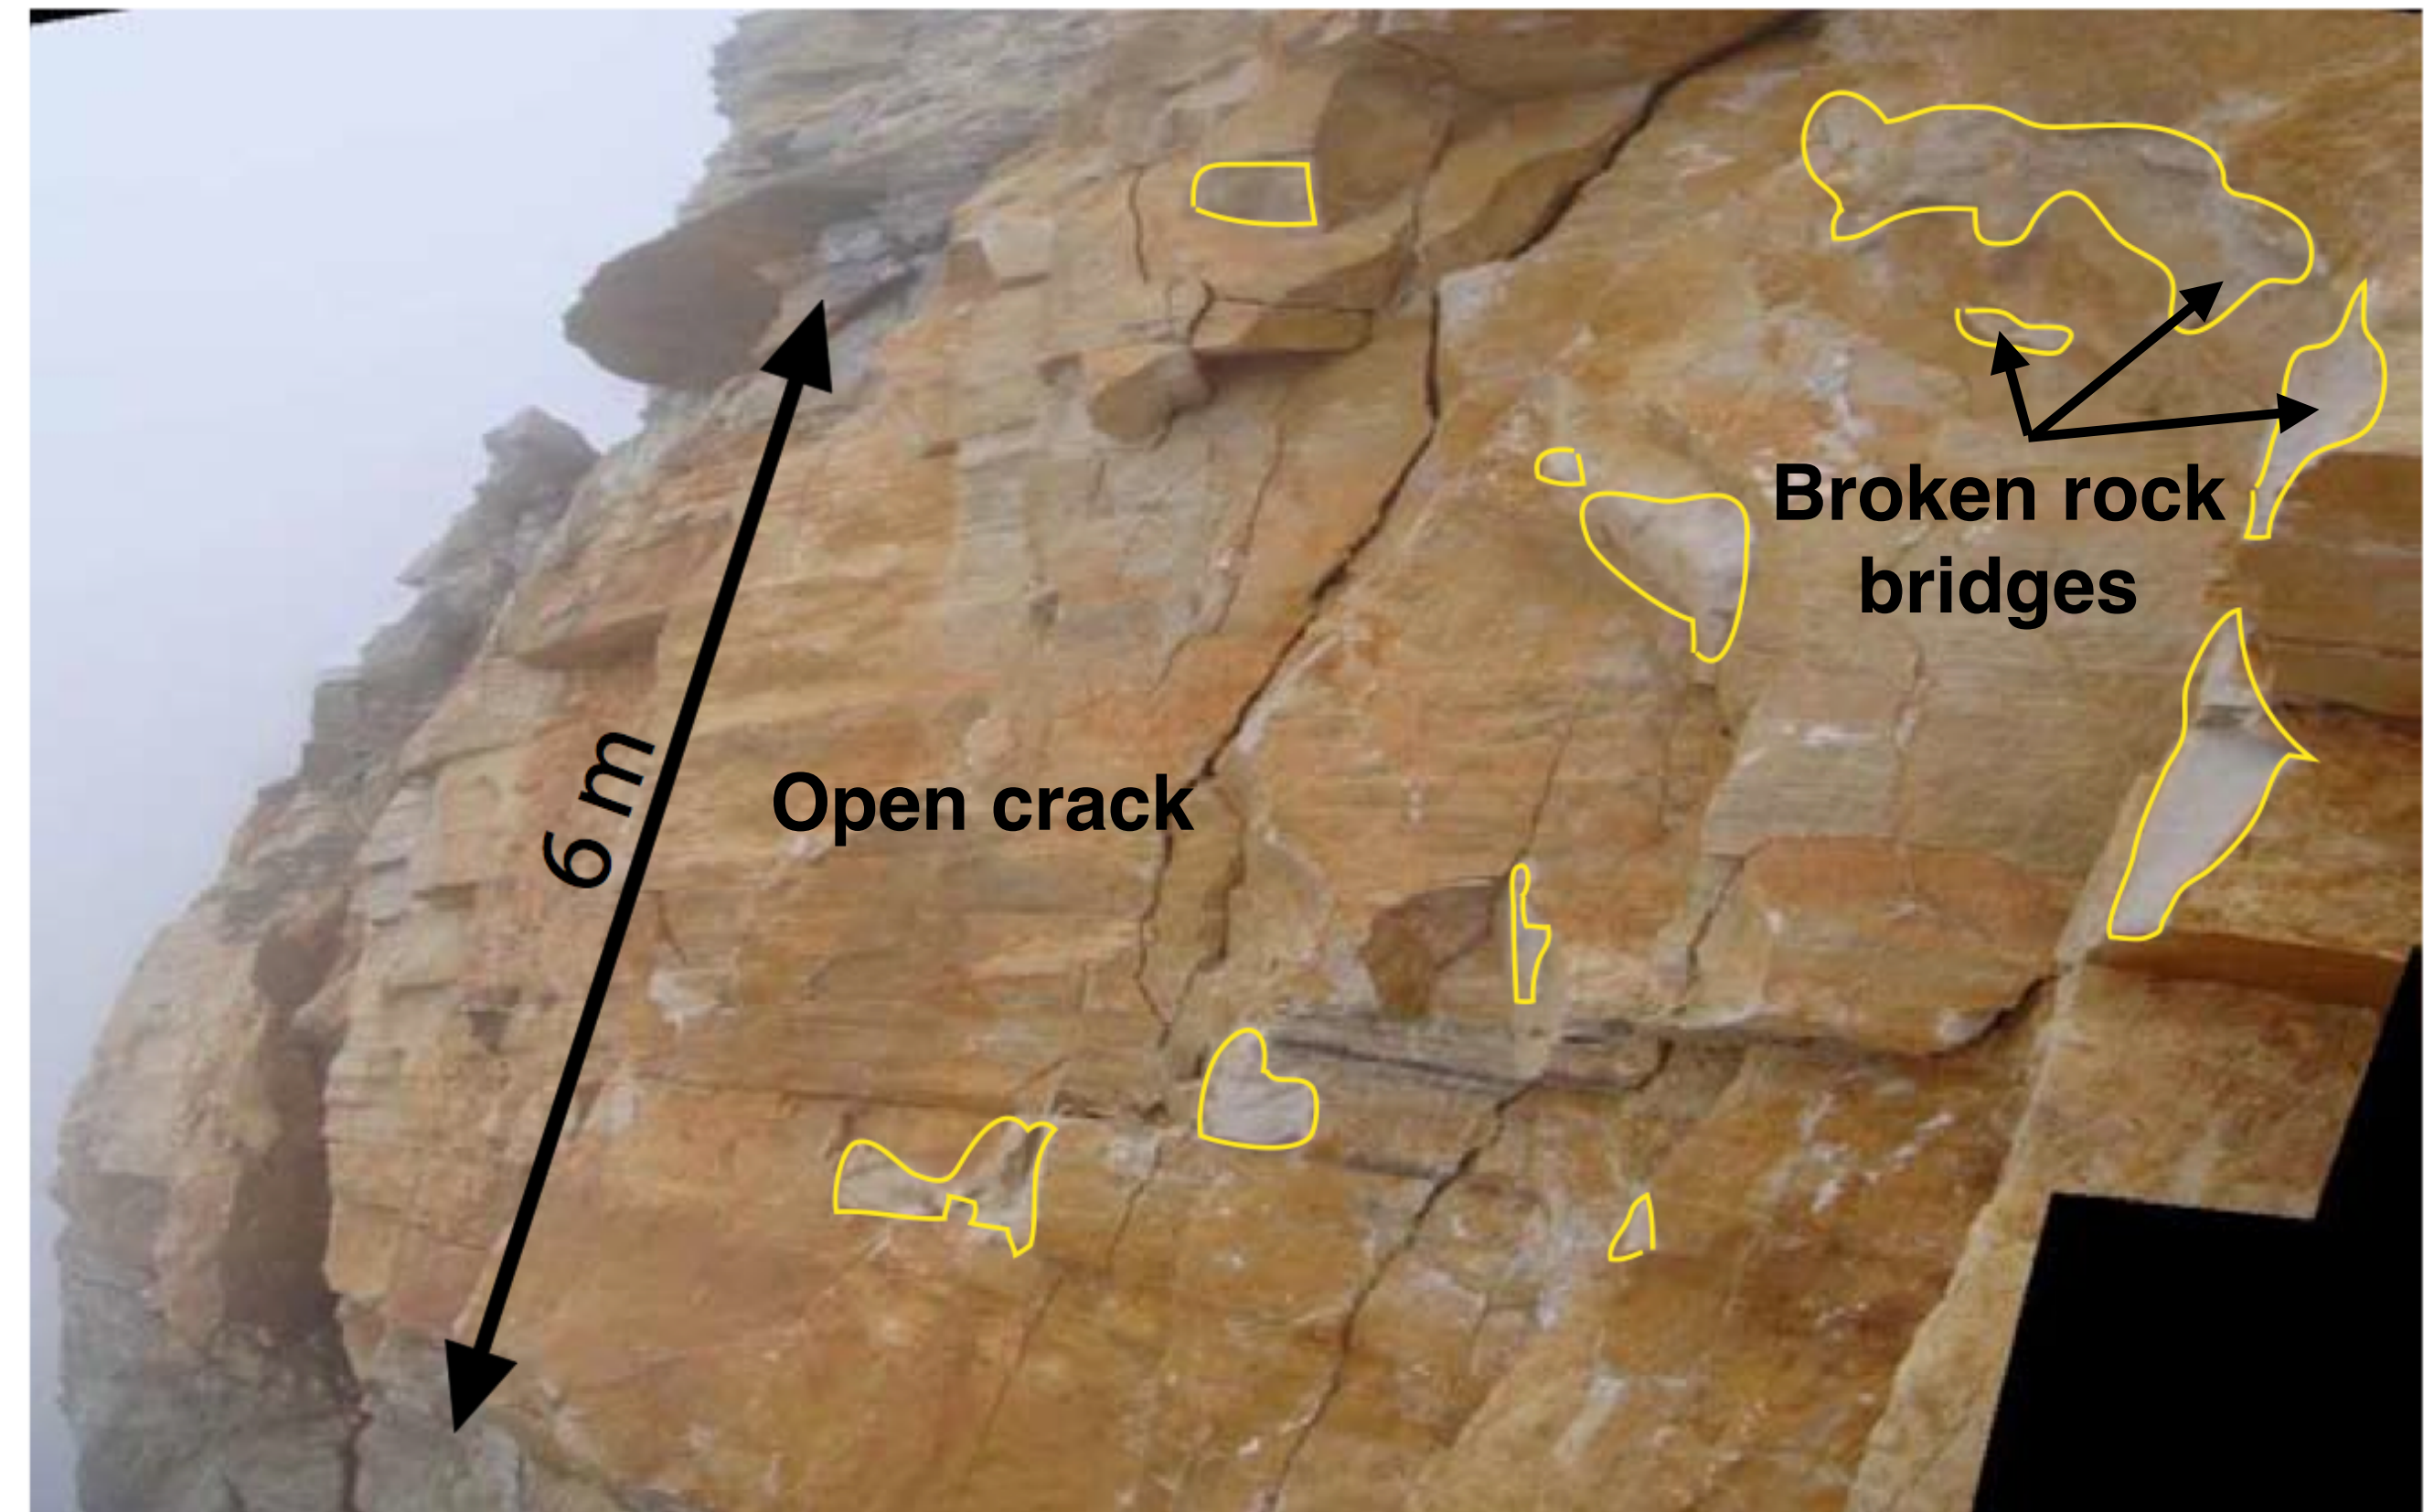

*Modified from Levy (C. Levy 2011) (with reproduction authorization)*

Supplement: Supplementary file 1 [file nhess-2020-279-supplement.pdf]
